# Supplementary material
Source: publisher figshare collection journal article supplement (https://future-science-group.figshare.com/ndownloader/files/28299939)
Supplement: Supplementary file 1 [file 28299939]

Table S1 Bilirubin clearance in control, UV treated and NP treated animals

| Groups | | Exp. runs | TSB* (mg dL-1) | | | | Bilirubin clearance  (%) |
| --- | --- | --- | --- | --- | --- | --- | --- |
| Before induction | After induction | After treatment | Variation |
| UNC | |  | 0.62 | - | 0.59** | 0.03 | 4.83 |
|  | 0.70 | - | 0.66 | 0.04 | 5.71 |
|  | 0.54 | - | 0.58 | -0.02 | -3.70 |
| HBC | | 1 | 0.91 | 2.34 | 2.18 | 0.16 | 6.84 |
| 2 | 0.65 | 2.42 | 2.22 | 0.20 | 8.26 |
| 3 | 0.62 | 2.26 | 2.11 | 0.15 | 6.64 |
| Treatment groups | UV-treated | 1 | 0.71 | 2.34 | 1.35 | 0.99 | 42.31 |
| 2 | 0.78 | 2.53 | 1.41 | 1.12 | 44.27 |
| 3 | 0.74 | 2.41 | 1.31 | 1.10 | 45.64 |
| NPs | 1 | 0.83 | 2.26 | 1.41 | 0.85 | 37.61 |
| 2 | 0.9 | 2.77 | 1.64 | 1.13 | 40.79 |
| 3 | 0.66 | 2.45 | 1.53 | 0.92 | 37.55 |
| UV+NPs | 1 | 0.94 | 2.55 | 1.05 | 1.50 | 58.82 |
| 2 | 0.47 | 2.87 | 1.02 | 1.85 | 64.46 |
| 3 | 0.73 | 2.54 | 0.98 | 1.56 | 61.42 |

*TSB: Total serum bilirubin, UNC: Untreated normal control, HBC: Hyperbilirubinemic control, NPs: Nanoparticles

**The animals were left untreated and the samples were taken after completion of treatment of the hyperbilirubinemic groups for comparison
